# Supplementary material
Source: PubMed Central journal article supplement (PMC4834192)
Supplement: NIHMS773361-supplement-Appendix.pdf [file NIHMS773361-supplement-Appendix.pdf]

# THE LANCET Infectious Diseases

## Supplementary webappendix

This webappendix formed part of the original submission and has been peer reviewed.  
We post it as supplied by the authors.

Supplement to: Siroka A, Ponce NA, Lönnroth K. Association between spending on social protection and tuberculosis burden: a global analysis. *Lancet Infect Dis* 2015; published online Dec 22. [http://dx.doi.org/10.1016/S1473-3099\(15\)00401-6](http://dx.doi.org/10.1016/S1473-3099(15)00401-6).

## Technical Appendix

### a) Hausman – Wu test for fixed effects vs. random effects

```
. hausman fe re
```

|                 | ---- Coefficients ---- |           |            |                     |
|-----------------|------------------------|-----------|------------|---------------------|
|                 | (b)                    | (B)       | (b-B)      | sqrt(diag(V_b-V_B)) |
|                 | fe                     | re        | Difference | S.E.                |
| SP              | -18.33428              | -24.59519 | 6.26091    | 4.837126            |
| SP <sup>2</sup> | .5619346               | .8138609  | -.2519263  | .1699151            |
| gdp_pc          | -1.753677              | -1.756021 | .0023438   | .4368772            |
| hiv15_1000      | 5.544435               | 2.629303  | 2.915132   | .9677796            |
| health_exp      | -2.509421              | -1.749349 | -.7600714  | 2.385334            |
| pop_density     | -.0157383              | -.0167347 | .0009964   | .0693492            |
| foreign_pct     | 12.27715               | .0510066  | 12.22614   | 6.446665            |
| tx_success      | -.6979976              | -.5823997 | -.1155978  | .1615951            |

b = consistent under Ho and Ha; obtained from xtreg  
 B = inconsistent under Ha, efficient under Ho; obtained from xtreg

Test: Ho: difference in coefficients not systematic

chi2(8) = (b-B)'[(V\_b-V\_B)^(-1)](b-B)  
 = 15.66  
 Prob>chi2 = 0.0476

Here we reject the null hypothesis and thus prefer the fixed effects models as the random effects model is not consistent.

### b) Variance Inflation Factor

| Variable    | VIF  | 1/VIF    |
|-------------|------|----------|
| gdp_pc      | 2.34 | 0.427371 |
| SP          | 2.20 | 0.454680 |
| health_exp  | 1.63 | 0.611636 |
| foreign_pct | 1.60 | 0.625646 |

|             |  |      |          |
|-------------|--|------|----------|
| pop_density |  | 1.33 | 0.754002 |
| hiv15_1000  |  | 1.18 | 0.847576 |
| tx_success  |  | 1.09 | 0.918013 |

-----+-----  
Mean VIF | 1.62

**c) Model of one year lagged social protection on TB prevalence**

| Prevalence              |  | Coef.     | Std. Err. | t     | P> t  | [95% Conf. Interval] |
|-------------------------|--|-----------|-----------|-------|-------|----------------------|
| lag_SP_1yr              |  | -14.04969 | 6.763278  | -2.08 | 0.038 | -27.33777 - .7616183 |
| lag_SP_1yr <sup>2</sup> |  | .4311702  | .27008    | 1.60  | 0.111 | -.0994666 .961807    |
| gdp_pc                  |  | -1.367636 | .7635497  | -1.79 | 0.074 | -2.867811 .1325401   |
| hiv15_1000              |  | 6.938215  | 1.070568  | 6.48  | 0.000 | 4.834828 9.041601    |
| health_exp              |  | -7.484236 | 4.453374  | -1.68 | 0.093 | -16.23395 1.265481   |
| pop_density             |  | -.0112415 | .0640035  | -0.18 | 0.861 | -.1369917 .1145086   |
| foreign_pct             |  | 13.06944  | 6.537021  | 2.00  | 0.046 | .2259003 25.91298    |
| tx_success              |  | -.6857974 | .3769401  | -1.82 | 0.069 | -1.426386 .0547915   |
| _cons                   |  | 182.4746  | 55.86098  | 3.27  | 0.001 | 72.72232 292.2268    |

**d) Model of one year lagged social protection on TB incidence**

| Incidence               |  | Coef.     | Std. Err. | t     | P> t  | [95% Conf. Interval] |
|-------------------------|--|-----------|-----------|-------|-------|----------------------|
| lag_SP_1yr              |  | -6.899385 | 4.133453  | -1.67 | 0.096 | -15.02054 1.221771   |
| lag_SP_1yr <sup>2</sup> |  | .1906778  | .1650624  | 1.16  | 0.249 | -.1336267 .5149824   |
| gdp_pc                  |  | -.7523139 | .4666519  | -1.61 | 0.108 | -1.669163 .1645353   |
| hiv15_1000              |  | 7.880551  | .6542895  | 12.04 | 0.000 | 6.595043 9.166059    |
| health_exp              |  | -4.471112 | 2.721729  | -1.64 | 0.101 | -9.8186 .8763752     |
| pop_density             |  | .0052164  | .0391165  | 0.13  | 0.894 | -.0716372 .08207     |
| foreign_pct             |  | 5.781611  | 3.995173  | 1.45  | 0.148 | -2.067862 13.63108   |
| tx_success              |  | -.246863  | .2303712  | -1.07 | 0.284 | -.6994822 .2057562   |
| _cons                   |  | 79.65325  | 34.14006  | 2.33  | 0.020 | 12.57695 146.7296    |

e) Model of one year lagged social protection on TB mortality

| Mortality               | Coef.     | Std. Err. | t     | P> t  | [95% Conf. Interval] |           |
|-------------------------|-----------|-----------|-------|-------|----------------------|-----------|
| lag_SP_1yr              | -4.837762 | 2.051671  | -2.36 | 0.019 | -8.86876             | -.8067628 |
| lag_SP_1yr <sup>2</sup> | .1531965  | .08193    | 1.87  | 0.062 | -.0077746            | .3141676  |
| gdp_pc                  | -.1587676 | .2316263  | -0.69 | 0.493 | -.6138528            | .2963176  |
| hiv15_1000              | 3.988148  | .3247617  | 12.28 | 0.000 | 3.350076             | 4.62622   |
| health_exp              | -1.906305 | 1.350951  | -1.41 | 0.159 | -4.560572            | .7479621  |
| pop_density             | .003986   | .0194158  | 0.21  | 0.837 | -.0341609            | .0421329  |
| foreign_pct             | 1.169915  | 1.983035  | 0.59  | 0.555 | -2.726231            | 5.066062  |
| tx_success              | -.19776   | .1143465  | -1.73 | 0.084 | -.422421             | .026901   |
| _cons                   | 16.44977  | 16.94568  | 0.97  | 0.332 | -16.84407            | 49.74361  |

f) Effect of a one percent of GDP increase in social protection spending (lagged one year) with 95% confidence bands (N=664)\*

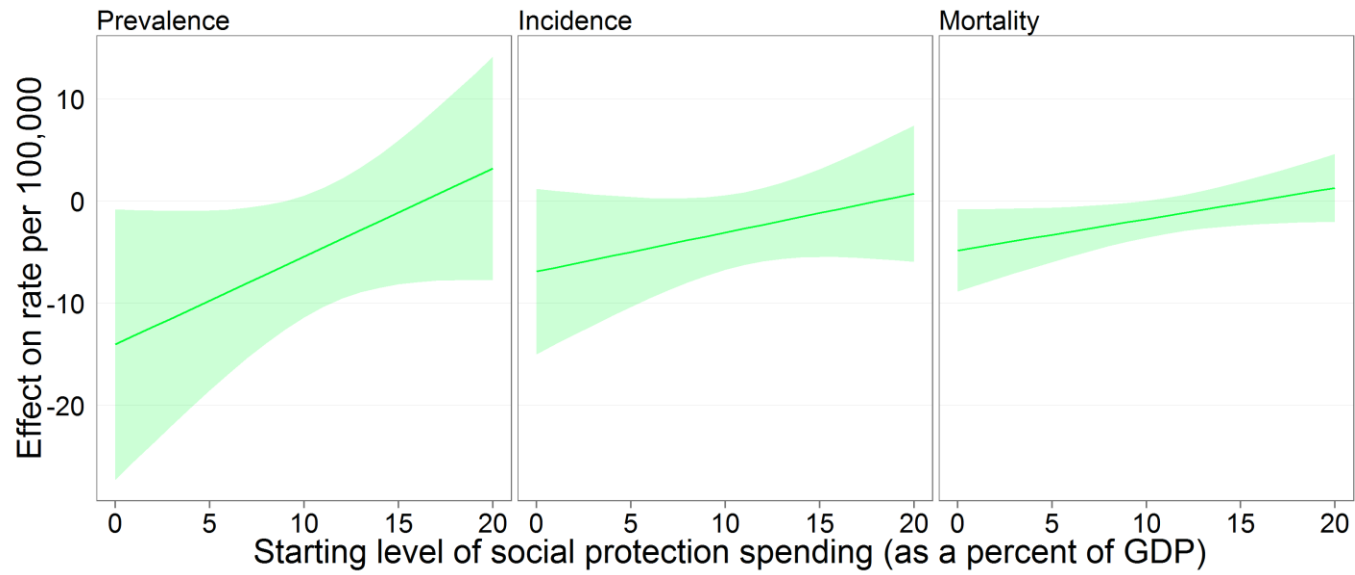

\* Models adjusted for GDP per capita, levels of health expenditure, adult HIV rate, percent of population foreign-born, population density, TB treatment success rate, and country-level fixed effects. Social protection and its squared term are not jointly significant at the .05 level in any of these models with p-values of 0.097, 0.183, 0.054 for prevalence, incidence rate, and mortality rate models, respectively.

g) Effect of a one percent of GDP increase in social protection spending with 95% confidence bands (non-Europe only)

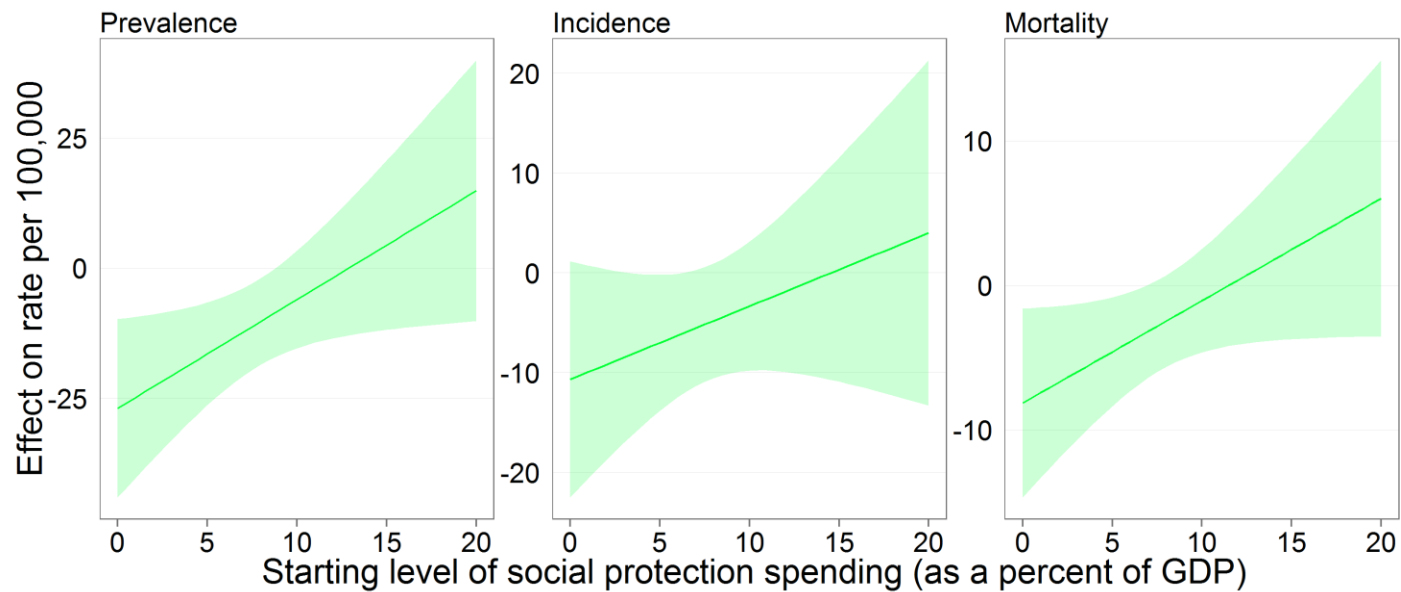

h) Effect of a one percent of GDP increase in social protection spending with 95% confidence bands (Europe only)

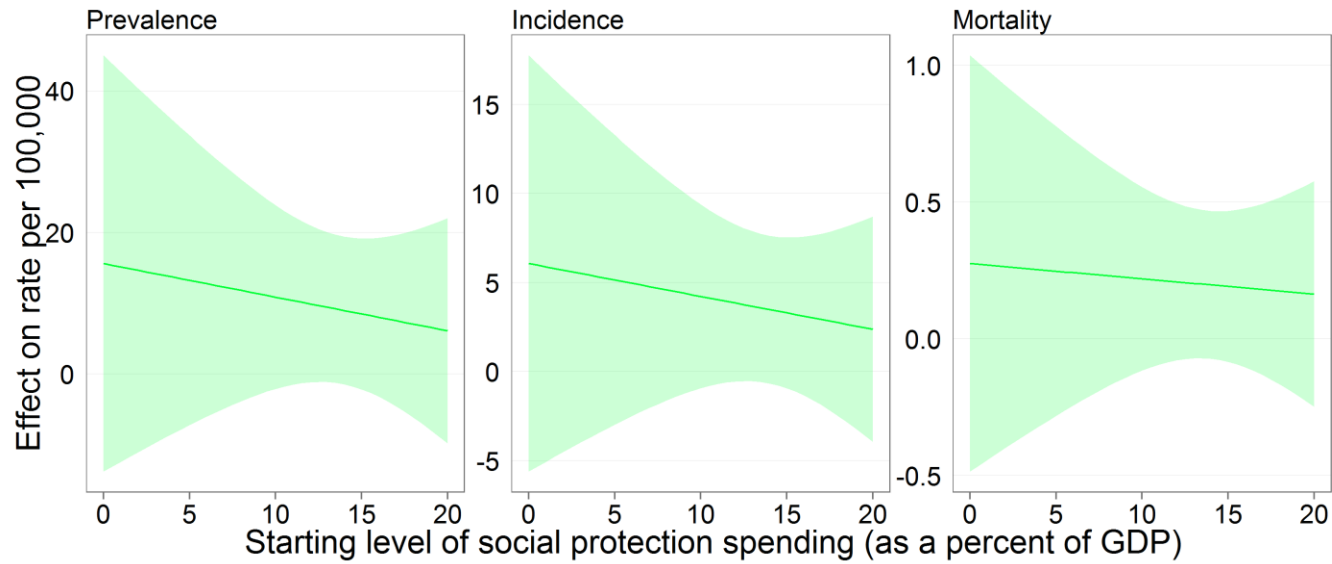

i) Univariate regressions on complete sample compared with only those with full covariate data

```
. reg Prevalence SP
```

| Source   | SS         | df  | MS         | Number of obs = | 803    |
|----------|------------|-----|------------|-----------------|--------|
| Model    | 7205355.24 | 1   | 7205355.24 | F( 1, 801) =    | 168.28 |
| Residual | 34295983.7 | 801 | 42816.4591 | Prob > F =      | 0.0000 |
| Total    | 41501339   | 802 | 51747.3054 | R-squared =     | 0.1736 |
|          |            |     |            | Adj R-squared = | 0.1726 |
|          |            |     |            | Root MSE =      | 206.92 |

| Prevalence | Coef.     | Std. Err. | t      | P> t  | [95% Conf. Interval] |
|------------|-----------|-----------|--------|-------|----------------------|
| SP         | -15.30435 | 1.179757  | -12.97 | 0.000 | -17.62013 -12.98857  |
| _cons      | 266.1382  | 10.58296  | 25.15  | 0.000 | 245.3646 286.9118    |

. reg Incidence SP

| Source   | SS         | df  | MS         | Number of obs = | 803    |
|----------|------------|-----|------------|-----------------|--------|
| Model    | 4191735.73 | 1   | 4191735.73 | F( 1, 801) =    | 121.65 |
| Residual | 27600000.3 | 801 | 34456.9292 | Prob > F =      | 0.0000 |
|          |            |     |            | R-squared =     | 0.1318 |
|          |            |     |            | Adj R-squared = | 0.1308 |
| Total    | 31791736   | 802 | 39640.5686 | Root MSE =      | 185.63 |

| Incidence | Coef.     | Std. Err. | t      | P> t  | [95% Conf. Interval] |
|-----------|-----------|-----------|--------|-------|----------------------|
| SP        | -11.67304 | 1.058341  | -11.03 | 0.000 | -13.75049 -9.595596  |
| _cons     | 203.2515  | 9.493796  | 21.41  | 0.000 | 184.6159 221.8872    |

. reg Mortality SP

| Source   | SS         | df  | MS         | Number of obs = | 803    |
|----------|------------|-----|------------|-----------------|--------|
| Model    | 309654.953 | 1   | 309654.953 | F( 1, 801) =    | 76.48  |
| Residual | 3243314.52 | 801 | 4049.0818  | Prob > F =      | 0.0000 |
|          |            |     |            | R-squared =     | 0.0872 |
|          |            |     |            | Adj R-squared = | 0.0860 |
| Total    | 3552969.47 | 802 | 4430.1365  | Root MSE =      | 63.632 |

| Mortality | Coef.     | Std. Err. | t     | P> t  | [95% Conf. Interval] |
|-----------|-----------|-----------|-------|-------|----------------------|
| SP        | -3.172679 | .3627985  | -8.75 | 0.000 | -3.884828 -2.460531  |
| _cons     | 48.44498  | 3.254467  | 14.89 | 0.000 | 42.05669 54.83327    |

. reg Prevalence SP

| Source   | SS         | df  | MS         | Number of obs = | 664    |
|----------|------------|-----|------------|-----------------|--------|
| Model    | 8714903.26 | 1   | 8714903.26 | F( 1, 662) =    | 200.39 |
| Residual | 28790574.4 | 662 | 43490.2937 | Prob > F =      | 0.0000 |
|          |            |     |            | R-squared =     | 0.2324 |
|          |            |     |            | Adj R-squared = | 0.2312 |



Total | 37505477.7 663 56569.3479 Root MSE = 208.54

| Prevalence | Coef.     | Std. Err. | t      | P> t  | [95% Conf. Interval] |           |
|------------|-----------|-----------|--------|-------|----------------------|-----------|
| SP         | -18.05844 | 1.27569   | -14.16 | 0.000 | -20.56332            | -15.55355 |
| _cons      | 308.8554  | 11.97469  | 25.79  | 0.000 | 285.3425             | 332.3684  |

. reg Incidence SP

| Source   | SS         | df  | MS         | Number of obs = 664 |   |        |
|----------|------------|-----|------------|---------------------|---|--------|
| Model    | 5047337.76 | 1   | 5047337.76 | F( 1, 662)          | = | 138.43 |
| Residual | 24137759.1 | 662 | 36461.8717 | Prob > F            | = | 0.0000 |
| Total    | 29185096.8 | 663 | 44019.7539 | R-squared           | = | 0.1729 |
|          |            |     |            | Adj R-squared       | = | 0.1717 |
|          |            |     |            | Root MSE            | = | 190.95 |

| Incidence | Coef.     | Std. Err. | t      | P> t  | [95% Conf. Interval] |           |
|-----------|-----------|-----------|--------|-------|----------------------|-----------|
| SP        | -13.74295 | 1.168069  | -11.77 | 0.000 | -16.03652            | -11.44939 |
| _cons     | 235.8316  | 10.96446  | 21.51  | 0.000 | 214.3023             | 257.3609  |

. reg Mortality SP

| Source   | SS         | df  | MS         | Number of obs = 664 |   |        |
|----------|------------|-----|------------|---------------------|---|--------|
| Model    | 388039.045 | 1   | 388039.045 | F( 1, 662)          | = | 85.80  |
| Residual | 2993898.72 | 662 | 4522.50562 | Prob > F            | = | 0.0000 |
| Total    | 3381937.76 | 663 | 5100.96193 | R-squared           | = | 0.1147 |
|          |            |     |            | Adj R-squared       | = | 0.1134 |
|          |            |     |            | Root MSE            | = | 67.25  |

| Mortality | Coef.     | Std. Err. | t     | P> t  | [95% Conf. Interval] |           |
|-----------|-----------|-----------|-------|-------|----------------------|-----------|
| SP        | -3.810541 | .4113755  | -9.26 | 0.000 | -4.618299            | -3.002783 |
| _cons     | 58.21057  | 3.861513  | 15.07 | 0.000 | 50.62828             | 65.79286  |

. reg Prevalence SP

| Source   | SS         | df  | MS         | Number of obs = | 139    |
|----------|------------|-----|------------|-----------------|--------|
| Model    | 78499.7889 | 1   | 78499.7889 | F( 1, 137) =    | 3.86   |
| Residual | 2788955.53 | 137 | 20357.3396 | Prob > F =      | 0.0516 |
|          |            |     |            | R-squared =     | 0.0274 |
|          |            |     |            | Adj R-squared = | 0.0203 |
| Total    | 2867455.32 | 138 | 20778.6617 | Root MSE =      | 142.68 |

| Prevalence | Coef.     | Std. Err. | t     | P> t  | [95% Conf. Interval] |
|------------|-----------|-----------|-------|-------|----------------------|
| SP         | -4.844857 | 2.467216  | -1.96 | 0.052 | -9.723607 .0338936   |
| _cons      | 106.4458  | 16.35745  | 6.51  | 0.000 | 74.10001 138.7915    |

. reg Incidence SP

| Source   | SS         | df  | MS         | Number of obs = | 139    |
|----------|------------|-----|------------|-----------------|--------|
| Model    | 54683.2722 | 1   | 54683.2722 | F( 1, 137) =    | 4.00   |
| Residual | 1874158.38 | 137 | 13679.9882 | Prob > F =      | 0.0476 |
|          |            |     |            | R-squared =     | 0.0284 |
|          |            |     |            | Adj R-squared = | 0.0213 |
| Total    | 1928841.66 | 138 | 13977.1135 | Root MSE =      | 116.96 |

| Incidence | Coef.     | Std. Err. | t     | P> t  | [95% Conf. Interval] |
|-----------|-----------|-----------|-------|-------|----------------------|
| SP        | -4.043653 | 2.022505  | -2.00 | 0.048 | -8.043017 -.0442895  |
| _cons     | 81.99572  | 13.40905  | 6.11  | 0.000 | 55.48025 108.5112    |

. reg Mortality SP

| Source   | SS         | df  | MS         | Number of obs = | 139    |
|----------|------------|-----|------------|-----------------|--------|
| Model    | 1581.94054 | 1   | 1581.94054 | F( 1, 137) =    | 2.01   |
| Residual | 107994.351 | 137 | 788.279936 | Prob > F =      | 0.1589 |
|          |            |     |            | R-squared =     | 0.0144 |
|          |            |     |            | Adj R-squared = | 0.0072 |

Total | 109576.292 138 794.0311 Root MSE = 28.076

| Mortality | Coef.     | Std. Err. | t     | P> t  | [95% Conf. Interval] |          |
|-----------|-----------|-----------|-------|-------|----------------------|----------|
| SP        | -.6877677 | .4854974  | -1.42 | 0.159 | -1.647805            | .2722701 |
| _cons     | 11.79203  | 3.218811  | 3.66  | 0.000 | 5.427058             | 18.15701 |

j) Models only including significant variables

| Prevalence      | Coef.     | Std. Err.                         | t     | P> t  | [95% Conf. Interval] |           |
|-----------------|-----------|-----------------------------------|-------|-------|----------------------|-----------|
| SP              | -21.84089 | 6.721289                          | -3.25 | 0.001 | -35.04546            | -8.63631  |
| SP <sup>2</sup> | .7333698  | .2732467                          | 2.68  | 0.008 | .1965521             | 1.270187  |
| gdp_pc          | -1.520214 | .7509702                          | -2.02 | 0.043 | -2.995562            | -.0448652 |
| hiv15_1000      | 5.659381  | 1.030505                          | 5.49  | 0.000 | 3.63486              | 7.683901  |
| _cons           | 208.408   | 31.31447                          | 6.66  | 0.000 | 146.8879             | 269.9281  |
| sigma_u         | 216.83721 |                                   |       |       |                      |           |
| sigma_e         | 83.584533 |                                   |       |       |                      |           |
| rho             | .87063408 | (fraction of variance due to u_i) |       |       |                      |           |

F test that all u<sub>i</sub>=0: F(145, 514) = 17.31 Prob > F = 0.0000

| Incidence       | Coef.     | Std. Err. | t     | P> t  | [95% Conf. Interval] |           |
|-----------------|-----------|-----------|-------|-------|----------------------|-----------|
| SP              | -9.877333 | 3.796065  | -2.60 | 0.010 | -17.33458            | -2.420089 |
| SP <sup>2</sup> | .2841147  | .1532936  | 1.85  | 0.064 | -.0170255            | .585255   |
| hiv15_1000      | 7.23243   | .5834719  | 12.40 | 0.000 | 6.086219             | 8.378641  |
| _cons           | 81.44232  | 17.77529  | 4.58  | 0.000 | 46.52334             | 116.3613  |

| Mortality | Coef. | Std. Err. | t | P> t | [95% Conf. Interval] |  |
|-----------|-------|-----------|---|------|----------------------|--|
|-----------|-------|-----------|---|------|----------------------|--|

|                 |           |          |       |       |           |           |
|-----------------|-----------|----------|-------|-------|-----------|-----------|
| SP              | -5.800782 | 1.892717 | -3.06 | 0.002 | -9.519178 | -2.082387 |
| SP <sup>2</sup> | .1772475  | .0771118 | 2.30  | 0.022 | .0257552  | .3287398  |
| hiv15_1000      | 3.468475  | .2883356 | 12.03 | 0.000 | 2.902016  | 4.034933  |
| tx_success      | -.29663   | .1285887 | -2.31 | 0.021 | -.5492529 | -.0440072 |
| _cons           | 30.01912  | 12.80489 | 2.34  | 0.019 | 4.862875  | 55.17537  |

k) Models without treatment success rate measure

| Prevalence      | Coef.     | Std. Err. | t     | P> t  | [95% Conf. Interval] |
|-----------------|-----------|-----------|-------|-------|----------------------|
| SP              | -19.35604 | 6.883276  | -2.81 | 0.005 | -32.8783 -5.833771   |
| SP <sup>2</sup> | .6117568  | .2782257  | 2.20  | 0.028 | .0651795 1.158334    |
| gdp_pc          | -1.38356  | .6986723  | -1.98 | 0.048 | -2.756109 -.0110111  |
| hiv15_1000      | 5.594572  | 1.020126  | 5.48  | 0.000 | 3.590524 7.598619    |
| health_exp      | -3.684139 | 4.558839  | -0.81 | 0.419 | -12.64002 5.271747   |
| pop_density     | -.0226342 | .0727631  | -0.31 | 0.756 | -.165578 .1203096    |
| foreign_pct     | 11.88518  | 6.725175  | 1.77  | 0.078 | -1.326498 25.09685   |
| _cons           | 157.5685  | 52.09245  | 3.02  | 0.003 | 55.23235 259.9047    |

| Incidence | Coef.     | Std. Err. | t     | P> t  | [95% Conf. Interval] |
|-----------|-----------|-----------|-------|-------|----------------------|
| SP        | -8.374809 | 3.942451  | -2.12 | 0.034 | -16.11979 -.629824   |

|                 |  |           |          |       |       |           |          |
|-----------------|--|-----------|----------|-------|-------|-----------|----------|
| SP <sup>2</sup> |  | .2425585  | .159356  | 1.52  | 0.129 | -.0704979 | .555615  |
| gdp_pc          |  | -.722156  | .4001701 | -1.80 | 0.072 | -1.508294 | .0639822 |
| hiv15_1000      |  | 7.231679  | .5842851 | 12.38 | 0.000 | 6.083845  | 8.379513 |
| health_exp      |  | -2.246516 | 2.611111 | -0.86 | 0.390 | -7.37607  | 2.883039 |
| pop_density     |  | -.0035022 | .0416756 | -0.08 | 0.933 | -.0853744 | .07837   |
| foreign_pct     |  | 5.308902  | 3.851897 | 1.38  | 0.169 | -2.258189 | 12.87599 |
| _cons           |  | 67.80413  | 29.83637 | 2.27  | 0.023 | 9.190288  | 126.418  |

---

| Mortality       |  | Coef.     | Std. Err. | t     | P> t  | [95% Conf. Interval] |
|-----------------|--|-----------|-----------|-------|-------|----------------------|
| SP              |  | -5.480425 | 1.966043  | -2.79 | 0.006 | -9.342965 -1.617885  |
| SP <sup>2</sup> |  | .1775206  | .080211   | 2.21  | 0.027 | .0199361 .3351052    |
| gdp_pc          |  | -.1680805 | .2316958  | -0.73 | 0.469 | -.6232762 .2871153   |
| hiv15_1000      |  | 3.465532  | .2897895  | 11.96 | 0.000 | 2.896204 4.03486     |
| health_exp      |  | -1.150327 | 1.319518  | -0.87 | 0.384 | -3.742688 1.442034   |
| pop_density     |  | .0071206  | .0207081  | 0.34  | 0.731 | -.0335632 .0478043   |
| foreign_pct     |  | .5149366  | 1.925063  | 0.27  | 0.789 | -3.267092 4.296965   |
| tx_success      |  | -.2805772 | .1297184  | -2.16 | 0.031 | -.5354253 -.025729   |
| _cons           |  | 32.5183   | 17.10741  | 1.90  | 0.058 | -1.091374 66.12798   |

1) Models with GDP and GDP<sup>2</sup> term

---

| Prevalence          |  | Coef.     | Std. Err. | t     | P> t  | [95% Conf. Interval] |
|---------------------|--|-----------|-----------|-------|-------|----------------------|
| SP                  |  | -17.0452  | 6.924825  | -2.46 | 0.014 | -30.64995 -3.440437  |
| SP <sup>2</sup>     |  | .572345   | .2821405  | 2.03  | 0.043 | .0180418 1.126648    |
| gdp_pc              |  | -7.513893 | 1.827832  | -4.11 | 0.000 | -11.10492 -3.92287   |
| gdp_pc <sup>2</sup> |  | .0733616  | .0208373  | 3.52  | 0.000 | .0324239 .1142993    |
| hiv15_1000          |  | 5.641233  | 1.019644  | 5.53  | 0.000 | 3.638004 7.644461    |
| health_exp          |  | -.4651201 | 4.677308  | -0.10 | 0.921 | -9.654325 8.724085   |
| pop_density         |  | -.0053345 | .0728963  | -0.07 | 0.942 | -.1485493 .1378802   |

|             |  |           |          |       |       |           |          |
|-------------|--|-----------|----------|-------|-------|-----------|----------|
| foreign_pct |  | 10.50251  | 6.789735 | 1.55  | 0.123 | -2.836847 | 23.84186 |
| c_new_tsr   |  | -.7565626 | .45656   | -1.66 | 0.098 | -1.653537 | .1404113 |
| _cons       |  | 229.4136  | 60.5615  | 3.79  | 0.000 | 110.4323  | 348.3949 |

---

| Incidence           |  | Coef.     | Std. Err. | t     | P> t  | [95% Conf. Interval] |
|---------------------|--|-----------|-----------|-------|-------|----------------------|
| SP                  |  | -7.56666  | 3.992768  | -1.90 | 0.059 | -15.41099 .2776739   |
| SP <sup>2</sup>     |  | .2372112  | .1626787  | 1.46  | 0.145 | -.0823932 .5568155   |
| gdp_pc              |  | -3.545821 | 1.053905  | -3.36 | 0.001 | -5.61636 -1.475282   |
| gdp_pc <sup>2</sup> |  | .03373    | .0120145  | 2.81  | 0.005 | .0101258 .0573341    |
| hiv15_1000          |  | 7.268257  | .5879139  | 12.36 | 0.000 | 6.11322 8.423293     |
| health_exp          |  | -.9313843 | 2.696877  | -0.35 | 0.730 | -6.229766 4.366997   |
| pop_density         |  | .0037533  | .0420311  | 0.09  | 0.929 | -.0788226 .0863291   |
| foreign_pct         |  | 4.732935  | 3.914877  | 1.21  | 0.227 | -2.958371 12.42424   |
| c_new_tsr           |  | -.1719641 | .2632468  | -0.65 | 0.514 | -.6891481 .3452199   |
| _cons               |  | 88.3777   | 34.91901  | 2.53  | 0.012 | 19.77457 156.9808    |

---

| Mortality           |  | Coef.     | Std. Err. | t     | P> t  | [95% Conf. Interval] |
|---------------------|--|-----------|-----------|-------|-------|----------------------|
| SP                  |  | -5.32431  | 1.96638   | -2.71 | 0.007 | -9.18753 -1.46109    |
| SP <sup>2</sup>     |  | .1787814  | .0801169  | 2.23  | 0.026 | .0213809 .3361818    |
| gdp_pc              |  | -.8656717 | .5190327  | -1.67 | 0.096 | -1.885382 .1540385   |
| gdp_pc <sup>2</sup> |  | .0088845  | .005917   | 1.50  | 0.134 | -.0027402 .0205092   |
| hiv15_1000          |  | 3.477255  | .289539   | 12.01 | 0.000 | 2.908416 4.046094    |
| health_exp          |  | -.9027518 | 1.328173  | -0.68 | 0.497 | -3.512127 1.706623   |
| pop_density         |  | .0083805  | .0206997  | 0.40  | 0.686 | -.0322869 .0490479   |
| foreign_pct         |  | .3000191  | 1.928019  | 0.16  | 0.876 | -3.487836 4.087875   |

|           |  |           |          |       |       |           |           |
|-----------|--|-----------|----------|-------|-------|-----------|-----------|
| c_new_tsr |  | -.2876697 | .1296452 | -2.22 | 0.027 | -.5423752 | -.0329641 |
| _cons     |  | 35.44332  | 17.1971  | 2.06  | 0.040 | 1.657288  | 69.22936  |

m) GDP per capita as a predictor of social protection spending

| SP     |  | Coef.    | Std. Err. | t     | P> t  | [95% Conf. Interval] |
|--------|--|----------|-----------|-------|-------|----------------------|
| gdp_pc |  | .1989086 | .0105958  | 18.77 | 0.000 | .1781095 .2197078    |
| _cons  |  | 4.064813 | .222878   | 18.24 | 0.000 | 3.627312 4.502313    |

n) Karlson, Holm, Breen tests mediation of social protection on pathway from GDP per capita to TB burden

| Prevalence |  | Coef.     | Std. Err. | z     | P> z  | [95% Conf. Interval] |
|------------|--|-----------|-----------|-------|-------|----------------------|
| gdp_pc     |  |           |           |       |       |                      |
| Reduced    |  | -3.3992   | .6143293  | -5.53 | 0.000 | -4.603263 -2.195137  |
| Full       |  | -1.613236 | .6774309  | -2.38 | 0.017 | -2.940976 -.2854954  |
| Diff       |  | -1.785964 | .3221076  | -5.54 | 0.000 | -2.417284 -1.154645  |

| Incidence |  | Coef.     | Std. Err. | z     | P> z  | [95% Conf. Interval] |
|-----------|--|-----------|-----------|-------|-------|----------------------|
| gdp_pc    |  |           |           |       |       |                      |
| Reduced   |  | -1.987059 | .383414   | -5.18 | 0.000 | -2.738537 -1.235581  |
| Full      |  | -1.222266 | .4227969  | -2.89 | 0.004 | -2.050932 -.3935989  |
| Diff      |  | -.7647933 | .1892866  | -4.04 | 0.000 | -1.135788 -.3937984  |

| Mortality |  | Coef.     | Std. Err. | z     | P> z  | [95% Conf. Interval] |
|-----------|--|-----------|-----------|-------|-------|----------------------|
| gdp_pc    |  |           |           |       |       |                      |
| Reduced   |  | -.3981211 | .1432451  | -2.78 | 0.005 | -.6788764 -.1173659  |
| Full      |  | -.1751611 | .1579587  | -1.11 | 0.267 | -.4847545 .1344323   |
| Diff      |  | -.22296   | .0691262  | -3.23 | 0.001 | -.3584447 -.0874752  |
